# Supplementary material for: Exploration of Signature Genes and Their Correlation with Immune Cell Infiltration in Cirrhosis
Source: Research Square preprint supplement (doi:10.21203/rs.3.rs-4068920/v1), 2024-03-21
Supplement: Supplementary file 1 [file 994313d4e823ad71b7ebff71.xlsx]

## Sheet: Sheet1
LASSO analysis
ANXA4
LUM
RGS1
CPT1A
COL16A1
HLA-DRB5
HLA-DRB4
IL7R
CXCL6
FXYD6
FXYD6-FXYD2
HLA-DRA
DEFB1
HLA-DPA1
IGKV1D-39
IGKV1-39
ANOS2P
